# Supplementary material
Source: PubMed Central journal article supplement (PMC4516221)

**Data Supplement 1.** Enrollment Flow Sheet.

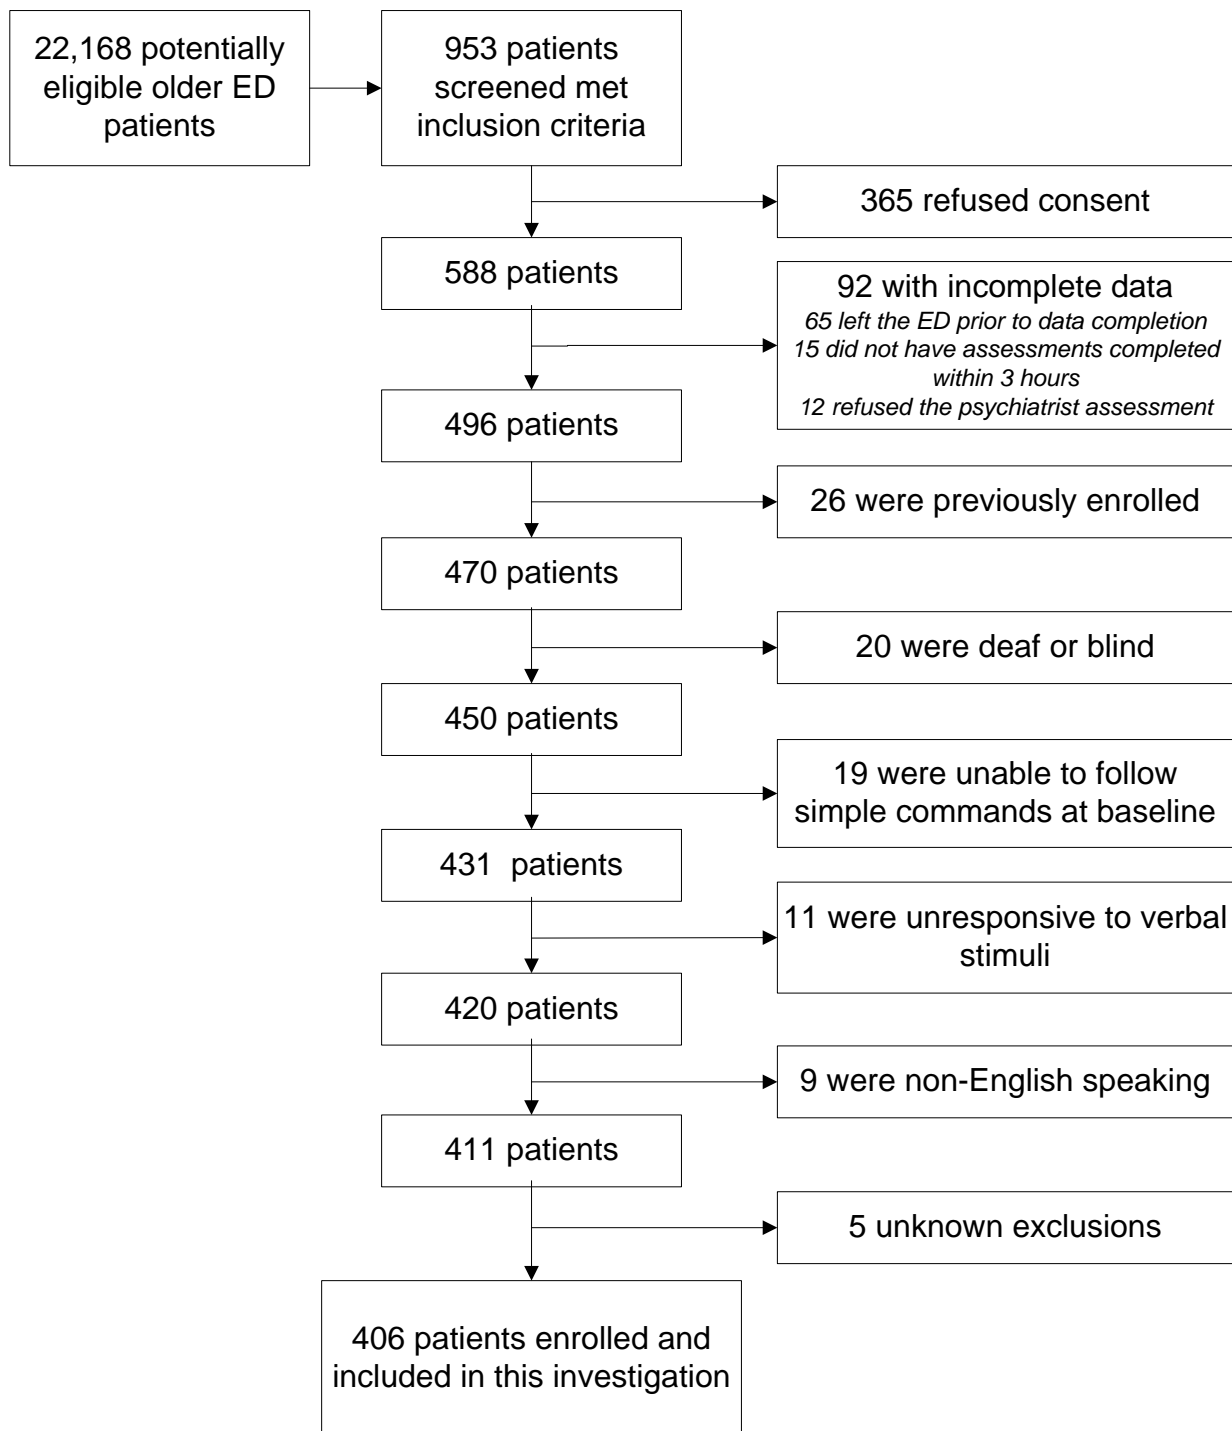

Supplement: NIHMS686263-supplement-Supp_Material.pdf [file NIHMS686263-supplement-Supp_Material.pdf]
